# Supplementary material for: How do Urban Interactions Influence Flood Resilience in Cities? A Land Use Simulation Framework for Flood Risk Regions
Source: Research Square preprint supplement (doi:10.21203/rs.3.rs-8341684/v1), 2025-12-26
Supplement: Supplementary file 1 [file 5cd036fa3697077b005fbc3f.docx]

**Supplementary Tables** for Manuscript titled “**How do Urban Interactions Influence Flood Resilience in Cities? A Land Use Simulation Framework for Flood Risk Regions**”

- **Table S1:**

Supplementary Table 1: Proposed Land Use and Land Cover Change-Based Scenarios for Urban Flood Resilience Assessment

| **No.** | **Scenario Name** | **Description** | **Focus** |
| --- | --- | --- | --- |
| 1 | Intense development focus | - Continuation of existing urban growth with minimum intervention. - Continuum of urban expansion from 6%, 22%, and 27% from 2001 to 2021 and 2031 | Maintain current growth |
| 2 | Controlled urban growth | - Strict regulations to control the expansion of wetlands and vegetation. - Restoration of biodiversity hotspots while promoting containment of the urban core. | Planned interventions through regulations |
| 3 | Environmental Conservation focus | - Deurbanization policy to reduce the sprawling effects on natural resources. - Recovery of wetlands and restoring vegetation to promote resilience. | Ecosystem restoration and de-urban focus |

Sources: Expert Consultation Reports, Western Region Megapolis Plan (2018) for Western Province of Sri Lanka

- **Table S2:**

Supplementary Table 2: LULC Feature Characteristics selected for Urban Flood Resilience Assessments

| **Feature Class** | **Description** |
| --- | --- |
| Built-up urban | Impervious areas, including residential, commercial, industrial areas, and physical infrastructure like roads and utility services |
| Vegetation | All green spaces, including parks, forest areas, and croplands with or without small built-up features |
| Wetlands | Paddy fields (operating and abandoned), water retention areas wholly or partially connected with waterbodies, and designated wetland bodies |
| Waterbodies | All water areas, including rivers, lakes, ponds, and waterways, both natural and man-made |

(Source: LaGro, 2005; Tripathy & Kumar, 2019)

- **Table S3:**

*Supplementary Table 3: Urban subsystem indicators identified for the resilience index (UFRI)*

| **Category** | **Natural System Attributes** | **Built System Attributes** | **Social System Attributes** |
| --- | --- | --- | --- |
| *Physical Vulnerability Factors* | - Run-off retention levels (High flood risk zones) - Water-logged areas density | - Building footprint density in risk zones - Motorable road density in risk zones | - Total dependent population aged below 15 and over 65 years |
| *Coping Capacity Factors* | - Lands located in higher elevations - Vegetation cover density | - Availability of flood relief centres (density) | - Total permanent housing stock (by material type) - Total households with access to safe drinking water |

Sources: (Banai, 2020; Berrebi et al., 2021; Feldman, 2017; Gu, 2019; Len et al., 2018; Serre & Heinzlef, 2018; Walker et al., 2004; Zuniga-Teran et al., 2020)

- **Table S4:**

Supplementary Table 4: The Variable Output from the BLR Analysis of LULC Features Against Susceptible (Low Resilience) Pixels

| **Step** | **Description** | **B** | **S.E.** | **Wald** | **df** | **Sig.** | **Exp(B)** |
| --- | --- | --- | --- | --- | --- | --- | --- |
| 1 | LULC_2021 |  |  | 47,196.13 | 3 | 0.000 |  |
|  | Waterbodies (1) | 1.37 | 0.02 | 6,800.81 | 1 | 0.000 | **3.926** |
|  | Wetlands (2) | -1.05 | 0.01 | 9,994.38 | 1 | 0.000 | **0.351** |
|  | Vegetation (3) | -2.08 | 0.01 | 29,192.05 | 1 | 0.000 | **0.125** |
|  | **Constant** | **-1.98** | **0.01** | **129,143.24** | **1** | **0.000** | **0.138** |
| 2 | LULC_2021 |  |  | 47,196.13 | 3 | 0.000 |  |
|  | Wetlands (1) | -2.42 | 0.02 | 17,994.07 | 1 | 0.000 | **0.089** |
|  | Vegetation (2) | -3.44 | 0.02 | 32,759.29 | 1 | 0.000 | **0.032** |
|  | Built-up (3) | -1.37 | 0.01 | 6,800.81 | 1 | 0.000 | **0.255** |
|  | **Constant** | **-0.61** | **0.01** | **1,530.64** | **1** | **0.000** | **0.542** |

Note: B denotes unstandardised Beta, S.E. denotes Standard Error for Beta, and df denotes the degrees of freedom

- **Table S5:**

Supplementary Table 5: The Variable Output from the BLR Analysis of LULC Features Against Responsive (High Resilience) Pixels

| **Step** | **Description** | **B** | **S.E.** | **Wald** | **df** | **Sig.** | **Exp(B)** |
| --- | --- | --- | --- | --- | --- | --- | --- |
| 3 | LULC_2021 |  |  | 92,479.89 | 3 | 0.000 |  |
|  | Waterbodies (1) | 0.93 | 0.04 | 688.68 | 1 | 0.000 | **2.544** |
|  | Wetlands (2) | 1.20 | 0.01 | 6,918.34 | 1 | 0.000 | **3.328** |
|  | Vegetation (3) | 2.93 | 0.01 | 52,462.02 | 1 | 0.000 | **18.676** |
|  | **Constant** | **-3.82** | **0.01** | **94,768.38** | **1** | **0.000** | **0.022** |
| 4 | LULC_2021 |  |  | 92,479.89 | 3 | 0.000 |  |
|  | Wetlands (1) | 0.27 | 0.03 | 61.66 | 1 | 0.000 | **1.308** |
|  | Vegetation (2) | 1.99 | 0.03 | 3,540.83 | 1 | 0.000 | **7.340** |
|  | Built-up (3) | -0.93 | 0.04 | 688.68 | 1 | 0.000 | **0.393** |
|  | **Constant** | **-2.88** | **0.03** | **7,475.81** | **1** | **0.000** | **0.056** |

Note: B denotes unstandardised Beta, S.E. denotes Standard Error for Beta, and df denotes the degrees of freedom
