# Supplementary material for: How do Urban Interactions Influence Flood Resilience in Cities? A Land Use Simulation Framework for Flood Risk Regions
Source: Research Square preprint supplement (doi:10.21203/rs.3.rs-8341684/v1), 2025-12-26
Supplement: Supplementary file 2 [file fb6e468946a91491fe43db3e.docx]

**Supplementary Figures** for Manuscript titled “**How do Urban Interactions Influence Flood Resilience in Cities? A Land Use Simulation Framework for Flood Risk Regions**”

- **Figure S1**


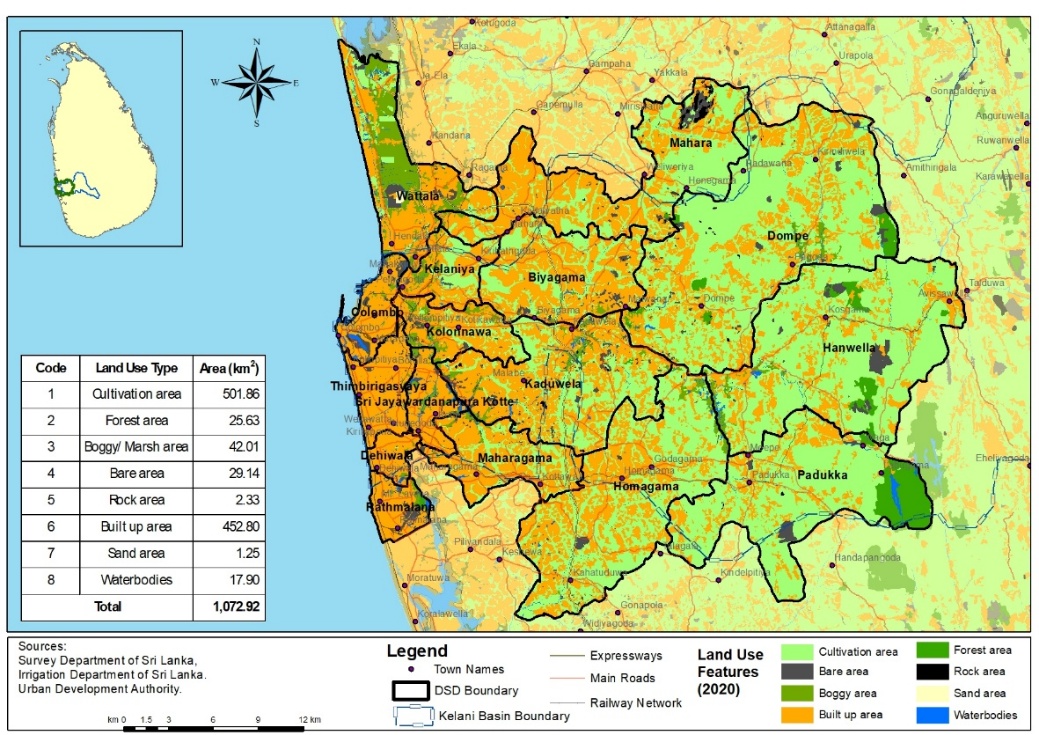


Supplementary Figure 1: Study Area Boundary with Land Use and Cover Features in Kelani River Basin

- **Figure S2**


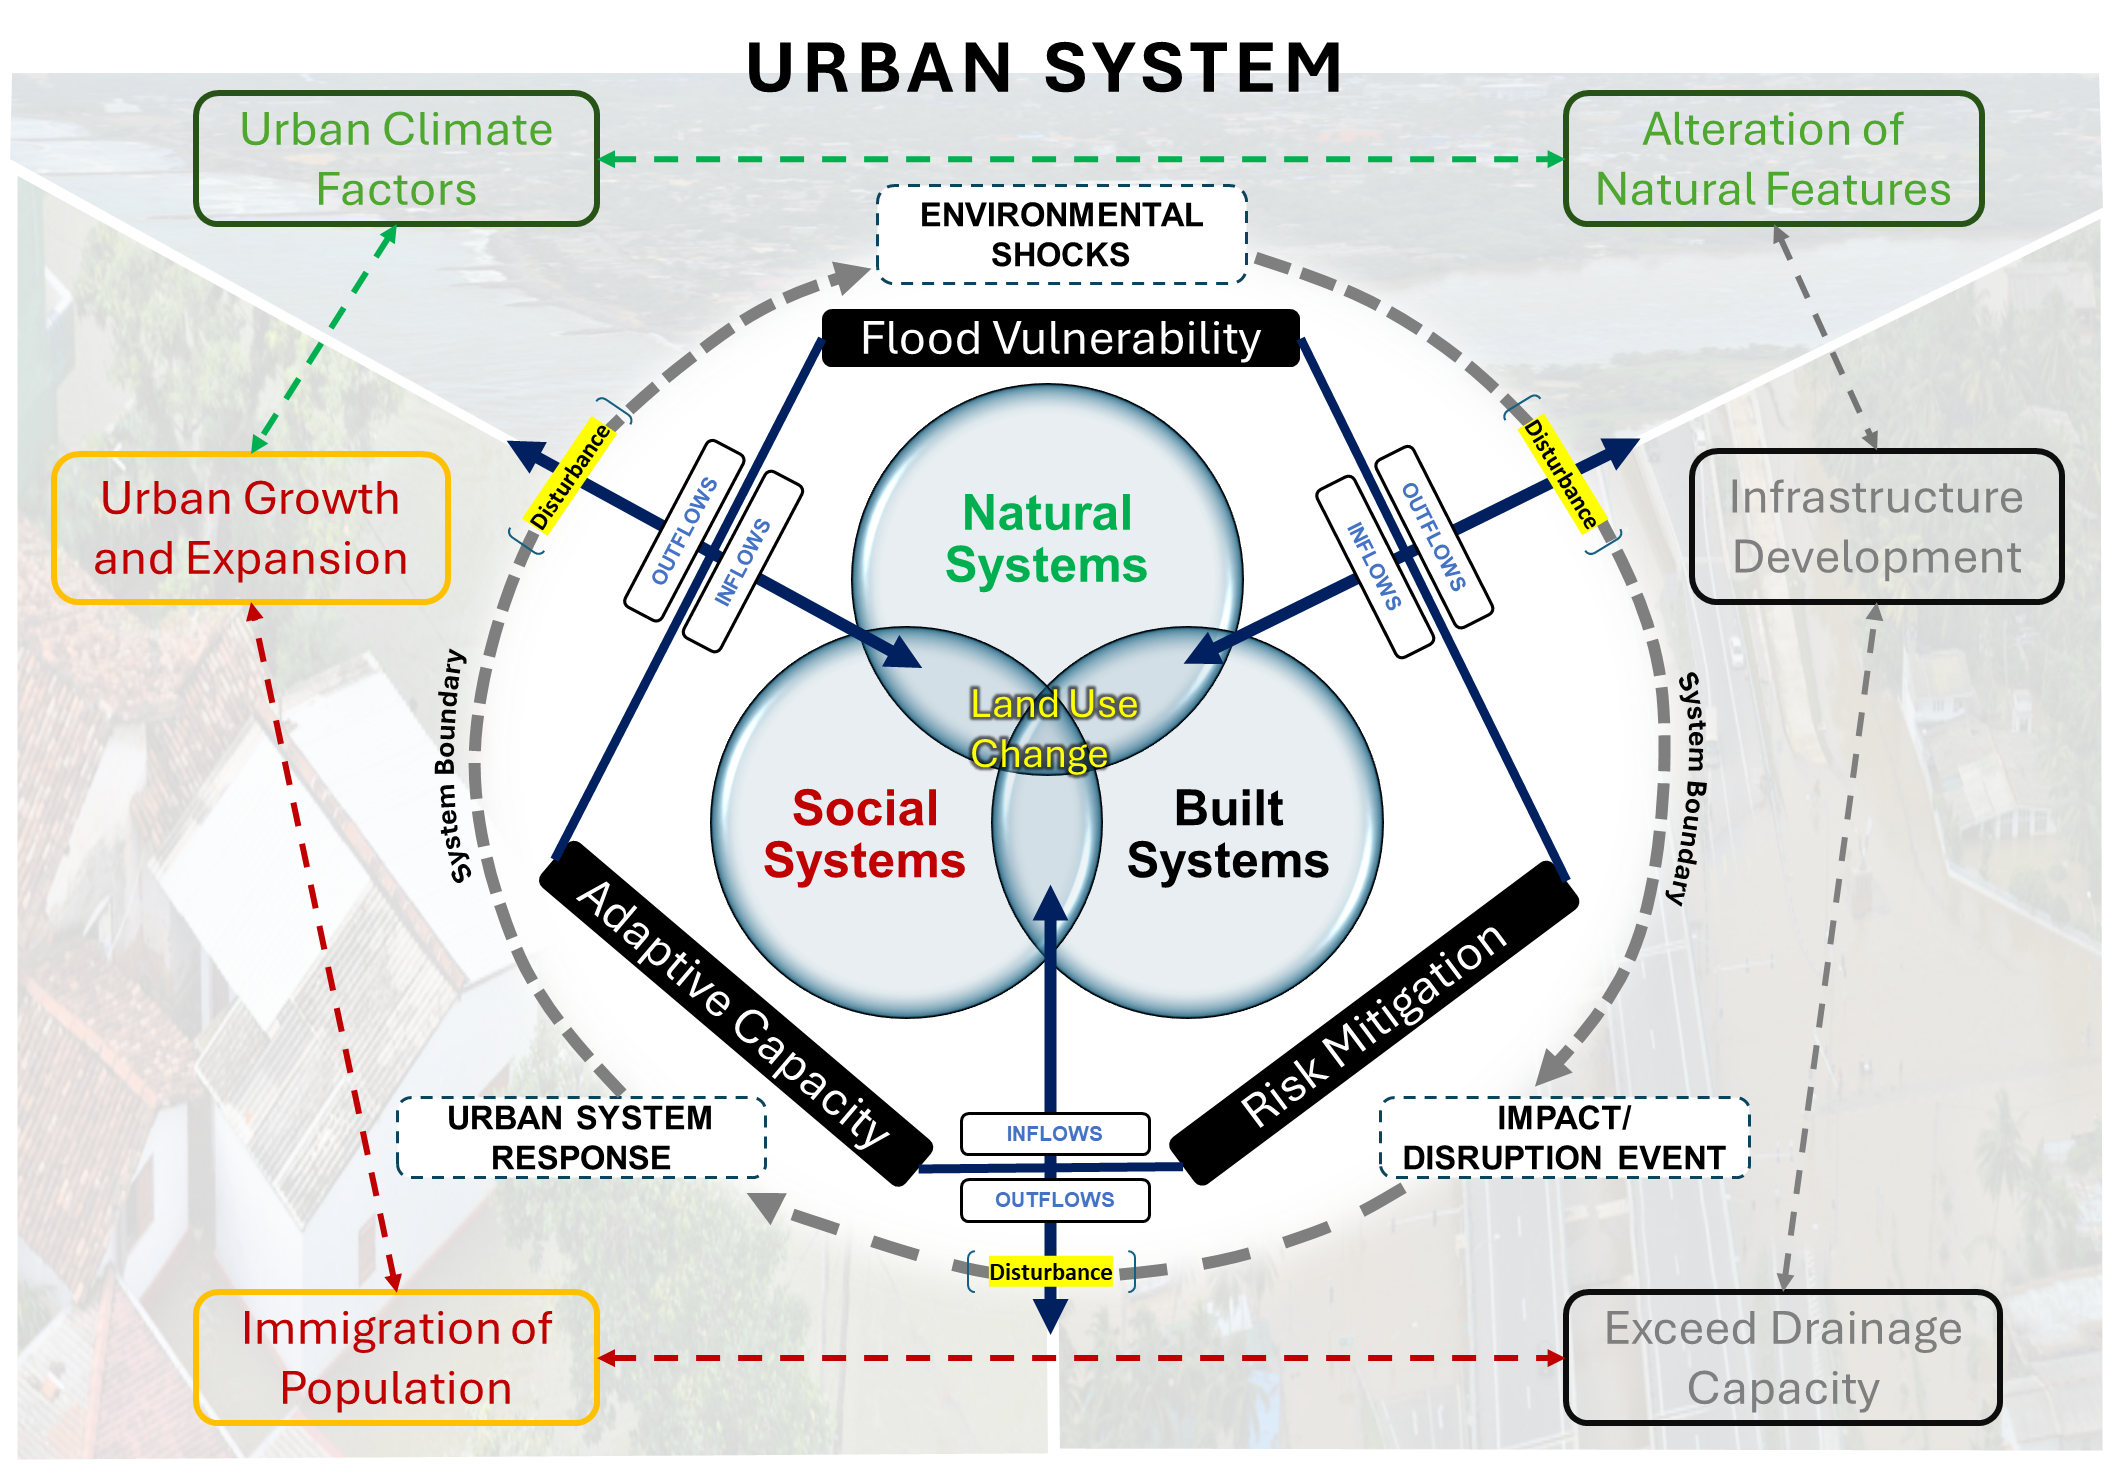


Supplementary Figure 2: Conceptual Framework proposed to quantify Urban Flood Resilience

- **Figure S3:**


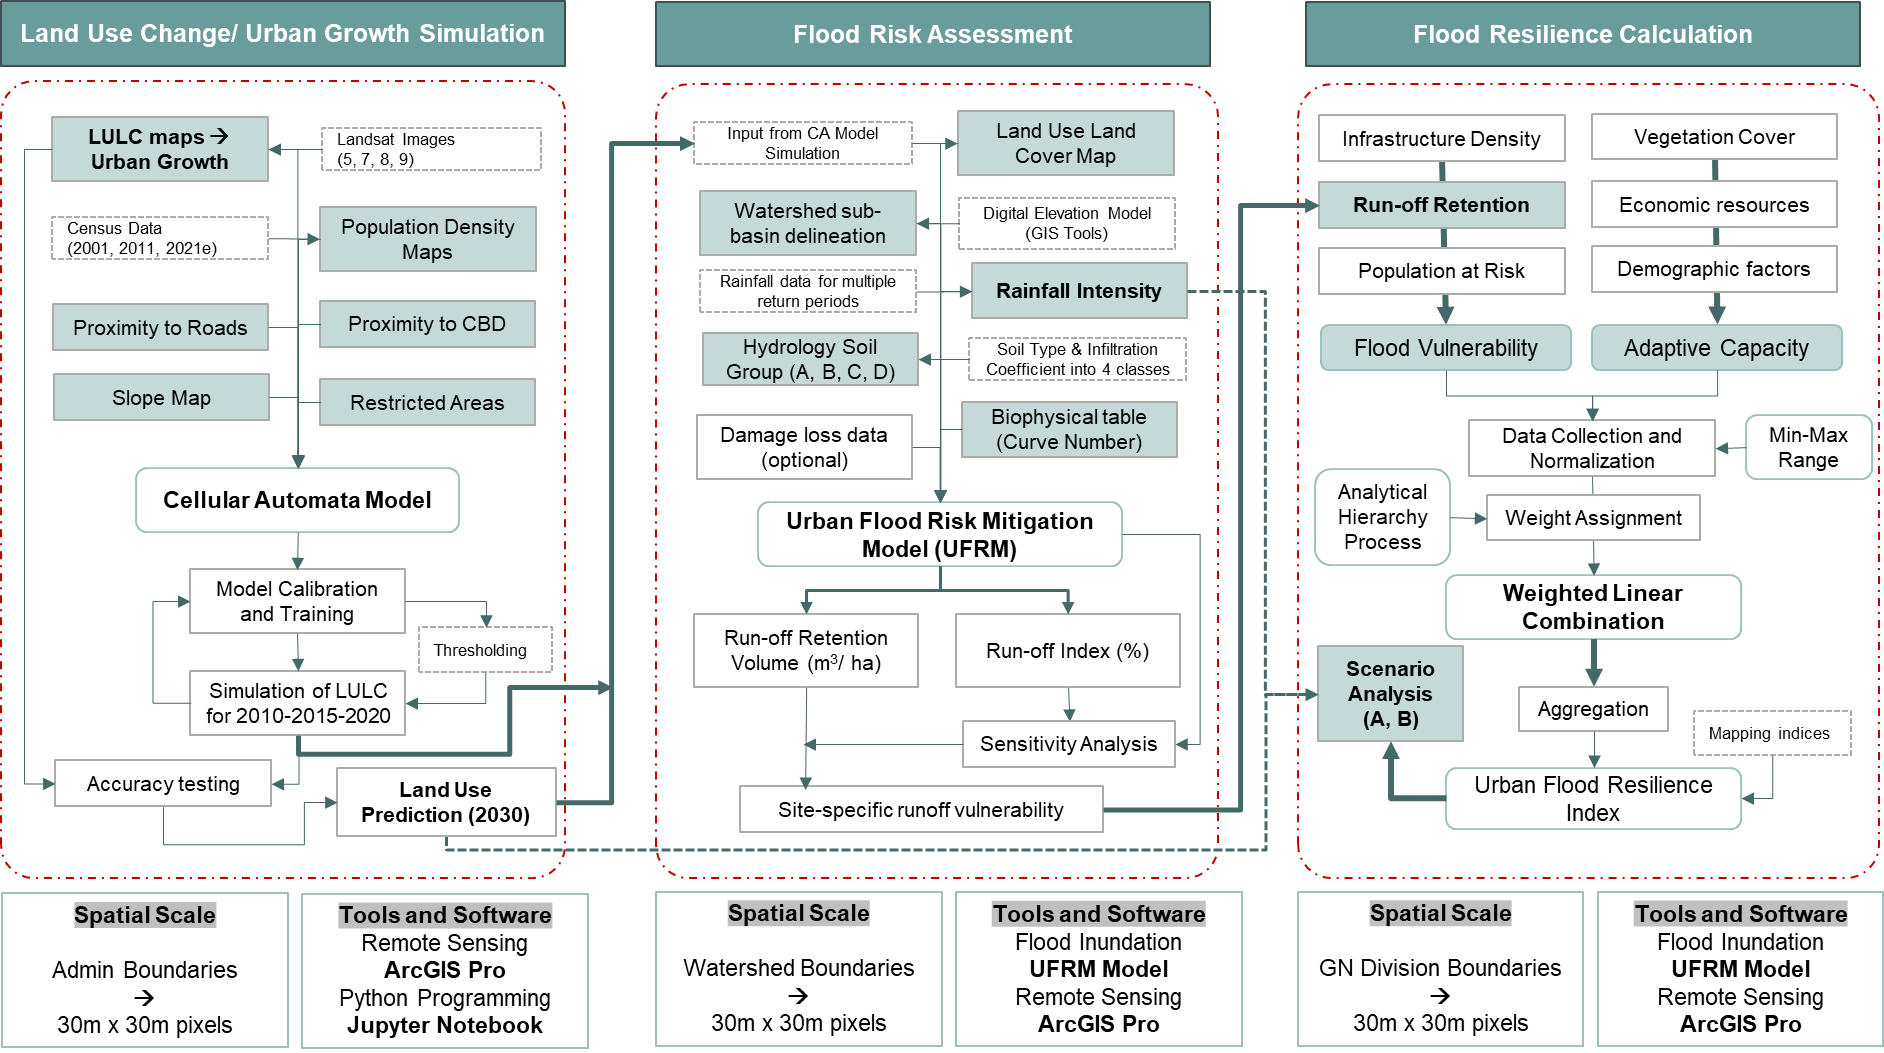


Supplementary Figure 3: Methodology adopted for Resilience Calculation

- **Figure S4:**


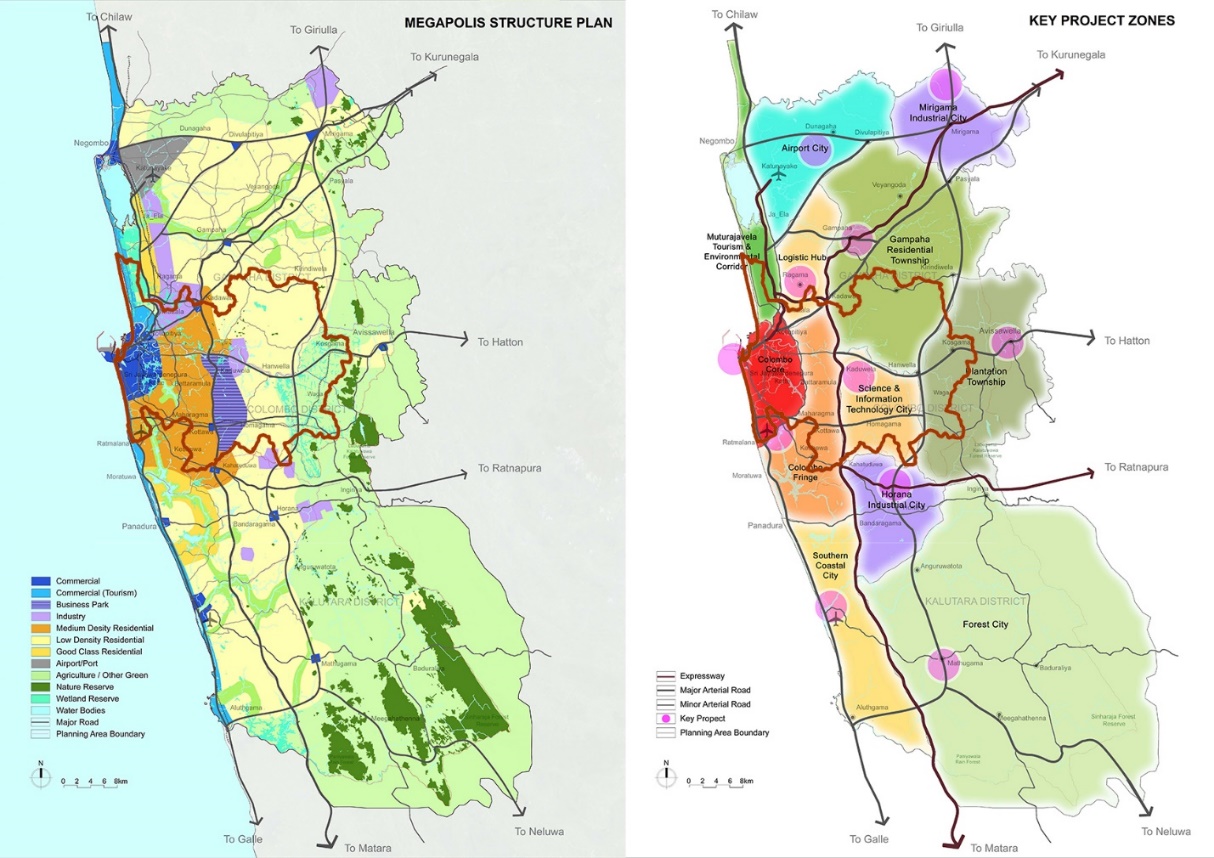


Supplementary Figure 4: Proposed Spatial Structure of Western Megapolis Plan (Left) and Key Project Zones (Right) (The study area boundary is marked in brown colour)

- **Figure S5:**


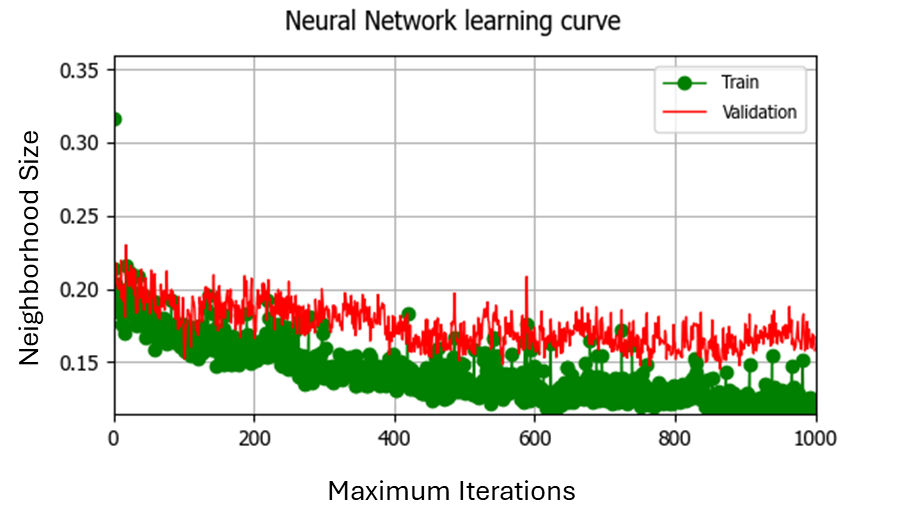


Supplementary Figure 5: Neural Network Learning Curve for Training and Validation of CA Model in Scenario One

- **Figure S6:**


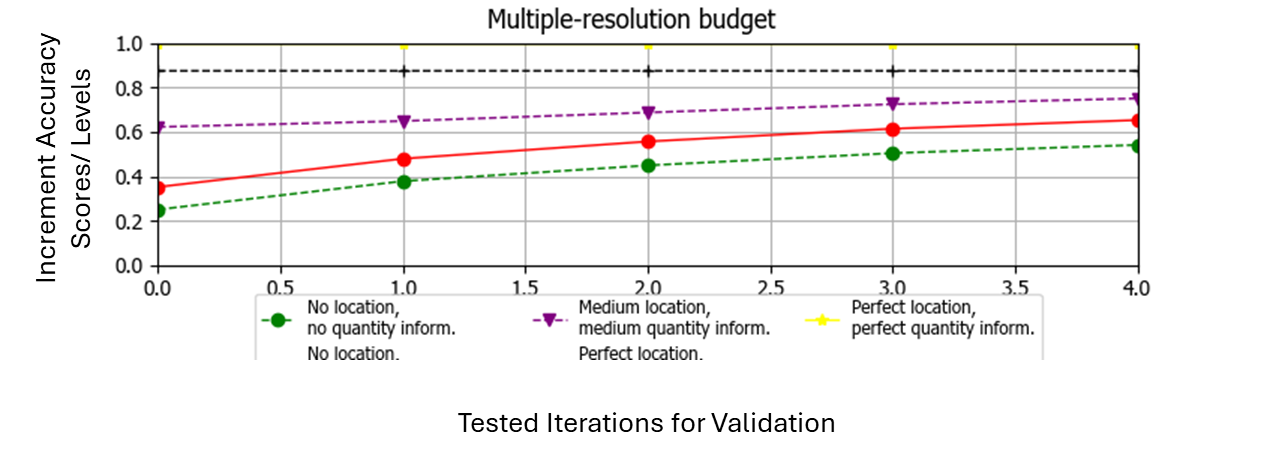


Supplementary Figure 6: Validation of the 2021 LULC Map Using the CA Model for Scenario Three

- **Figure S7:**


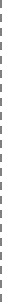


Supplementary Figure 7: LULC Change from 2001 to 2031 Under Three Proposed Scenarios

- **Figure S8:**

Supplementary Figure 8: Urban Flood Resilience Variation of Simulated Urban Growth (BAU Scenario) and Non-Simulated Version (Scenario Four) in 2031
